# Supplementary material for: Polar functional groups anchored to a 2D MOF template for the stabilization of Pd(0) nps for the catalytic C–C coupling reaction
Source: Royal Society of Chemistry journal article supplement (doi:10.1039/c8dt04766a), 2019-01-01
Supplement: c8dt04766a1.pdf [file c8dt04766a1.pdf]

## Supporting Information

### **Polar functional groups anchored 2D MOF template for stabilization of Pd(0) nps towards catalytic C-C coupling reaction**

Stephen Adie Adalikwu,<sup>a</sup> Venkata Suresh Mothika,<sup>a</sup> Arpan Hazra,<sup>a</sup> and Tapas Kumar Maji\*<sup>a</sup>

#### **Experimental Section**

##### **Materials and methods.**

Cu(NO<sub>3</sub>)<sub>2</sub>·3H<sub>2</sub>O, 1,2-bis(4-ypiridyl)ethane, 1,2,3-benzenetricarboxylate were purchased from Sigma Aldrich Chemical Co. and used as received. All substrates used for catalysis were obtained from commercial chemical suppliers such as Spectrochem and used without further purification.

##### **Characterization Techniques**

Suitable single crystals of **1** were mounted on a thin glass fiber with commercially available super glue. X-ray single crystal structural data were collected on a Bruker Smart-CCD diffractometer equipped with a normal focus, 2.4 kW sealed tube X-ray 12 source with graphite monochromated Mo-K $\alpha$  radiation ( $\lambda = 0.71073$  Å) operating at 50 kV and 30 mA. Powder X-ray diffraction (PXRD) measurements of all compounds were recorded on Bruker D8 Discover instrument using Cu-K $\alpha$  radiation. Thermogravimetric analysis (TGA) was carried out (Mettler Toledo) in nitrogen atmosphere in the temperature range 30 – 500 °C (heating rate = 5 °C min<sup>-1</sup>). Elemental analysis was carried out using a Thermo Scientific Flash 2000 CHN analyzer. Adsorption Measurements of N<sub>2</sub> (77K) and CO<sub>2</sub> (195 K) studies were carried out using QUANTACHROME QUADRASORB SI and AUTOSORB IQ2 instrument. The adsorbent

samples were degassed at 140 °C for 12 h under a high vacuum (10<sup>-1</sup> Pa) prior to measurements and adsorption isotherms were measured, all the operations were computer-controlled and automatic. For TEM measurements JEOL JEM 3010 instrument operating at an accelerating voltage of 300 kV was used and the samples were prepared by dispersing in ethanol by sonication before drop casting on a carbon-coated copper grid. Inductively coupled plasma-optical emission spectral (ICP-OES) analyses were performed using Perkin Elmer OPTIMA 7000 spectrometer. <sup>1</sup>H-NMR spectra were recorded in CDCl<sub>3</sub> with TMS as an internal standard at ambient temperature on a Bruker AVANCE 400 (400 MHz) Fourier transform NMR spectrometer.

### **Synthesis of {[Cu (1, 2, 3-btc)(bpe)·(H<sub>2</sub>O)]·H<sub>2</sub>O}<sub>n</sub> (1)**

Cu(NO<sub>3</sub>)<sub>2</sub>·3H<sub>2</sub>O (1 mmol, 0.242 g) was dissolved in distilled water (50 mL). Sodium 1,2,3-benzenetricarboxylate (Na<sub>3</sub>1,2,3-btc; 0.5 mmol, 0.138 g) and 4,4'-bipyridylethane (bpe; 0.5 mmol, 0.092 g) were dissolved in water and methanol in the ratio of 7:3 respectively and the resultant mixture (24 mL) was sonicated for 15 min to obtain a homogeneous solution. A solution mixture of Na<sub>3</sub>1,2,3-btc and bpe (2 mL) was slowly and carefully layered on top of the solution of Cu(NO<sub>3</sub>)<sub>2</sub>·3H<sub>2</sub>O solution (2 mL) using a buffer solution of water and methanol (3:7, 2 mL) in a crystal tube, which was sealed and left undisturbed at room temperature. Deep blue block single crystals were grown at the junction of the two different solvents after one month. The crystals were separated and washed with water and methanol, and subsequently subjected to X-ray diffraction. A bulk amount of the compound was synthesized by direct mixing of the corresponding ligands solution with a water solution of Cu(II). Yield: 88%; IR (KBr):  $\nu$ =1721 (C=O), 1115 (C-O), 3604 (OH), 1548 cm<sup>-1</sup> (Ar C=C); Anal. Calcd. For (1), C<sub>21</sub>H<sub>15</sub>CuN<sub>2</sub>O<sub>8</sub>: C, 51.80; H, 3.11; N, 5.75. Found: C, 50.98; H, 3.13; N, 5.54.

## Preparation of Pd(0)@1a Composite

Desolvated framework of **1** i.e. **1a** (0.005 g, 0.01 mmol) was dispersed in ethanol (1 mL) by sonication for 5 min. To this suspension, a solution of K<sub>2</sub>PdCl<sub>4</sub> (500 µL) [prepared by stirring the mixture of PdCl<sub>2</sub> (0.005g), KCl and H<sub>2</sub>O (5 mL) for 10 h] was added and followed by the addition of NaBH<sub>4</sub> (10<sup>-4</sup> M). The mixture was then washed thoroughly with ethanol, centrifuged and dried in an oven at 120 °C. The composite has been characterized by PXRD, TEM, EDAX, XPS and ICP-OES analyses.

## General Procedure for Catalytic Reaction Using Pd(0)@1a

In a dried schlenk tube, aryl halide (1 eq), aryl boronic acid (1 eq), Cs<sub>2</sub>CO<sub>3</sub> (1.5 eq) was added followed by the addition of THF (5 mL). The reaction mixture is degassed and purged with nitrogen followed by addition of **Pd(0)@1a** (1.5 mg) and stirred for 24 hrs at 60 °C and cooled to room temperature. The reaction mixture is filtered to separate the catalyst and dried under reduced pressure. The crude mixture is extracted with DCM and dried over anhydrous sodium sulphate (Na<sub>2</sub>SO<sub>4</sub>) and analyzed using <sup>1</sup>H-NMR spectroscopy.

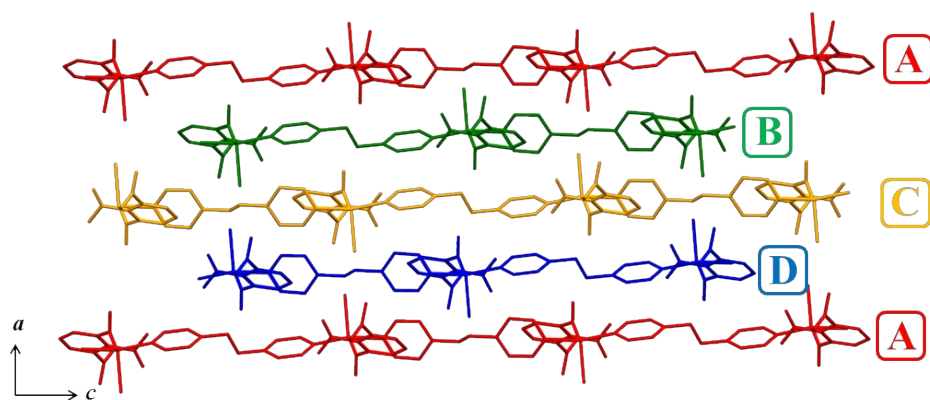

**Fig. S1** ABCD...ABCD packing in **1**.

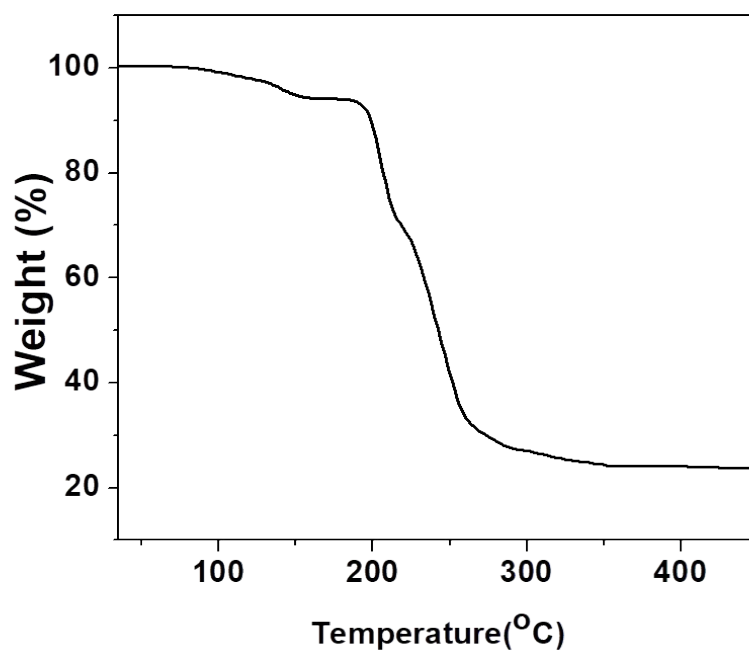

**Fig. S2** TGA of assynthesized **1** under N<sub>2</sub> atmosphere in the range of 30-500 °C with a heating rate of 5 °C/min.

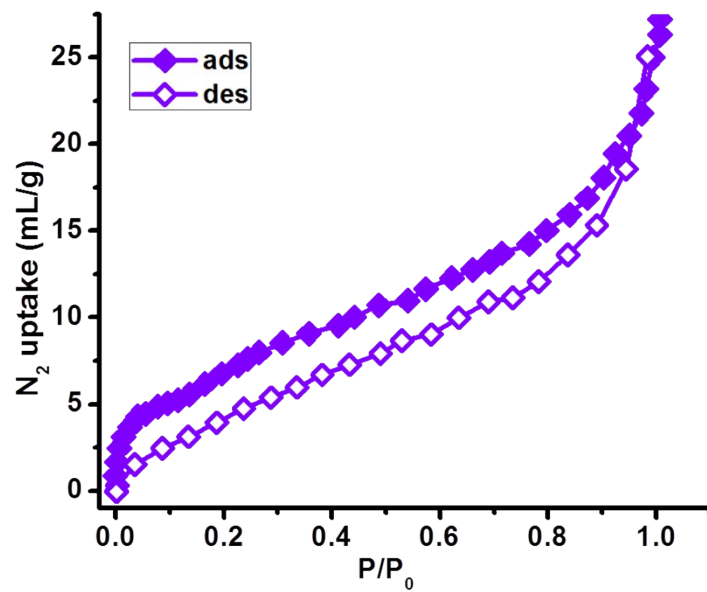

**Fig. S3** N<sub>2</sub> adsorption isotherm of **1a**; adsorption (filled symbols) and desorption (open symbols) at 77 K.

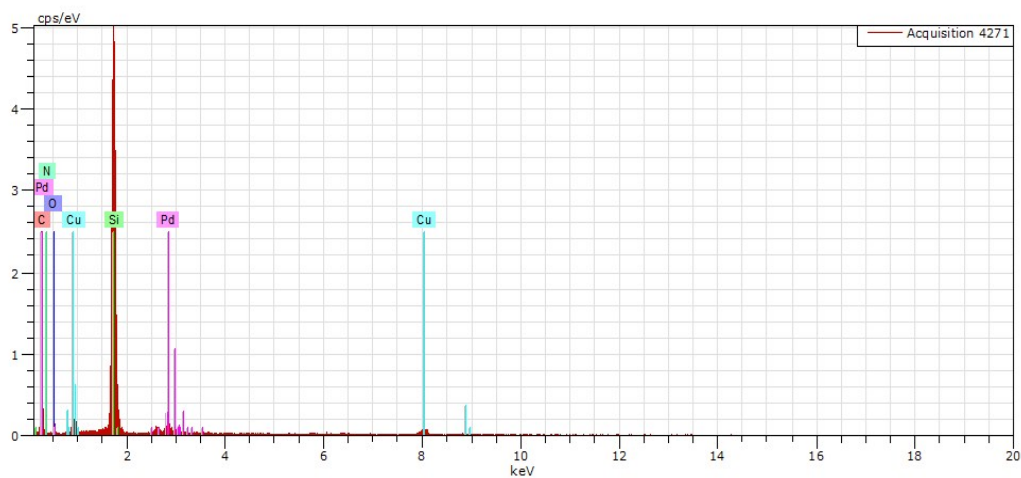

**Fig. S4** EDAX of **Pd(0)@1a** showing the presence of both ‘Pd’ and ‘Cu’ in the composite.

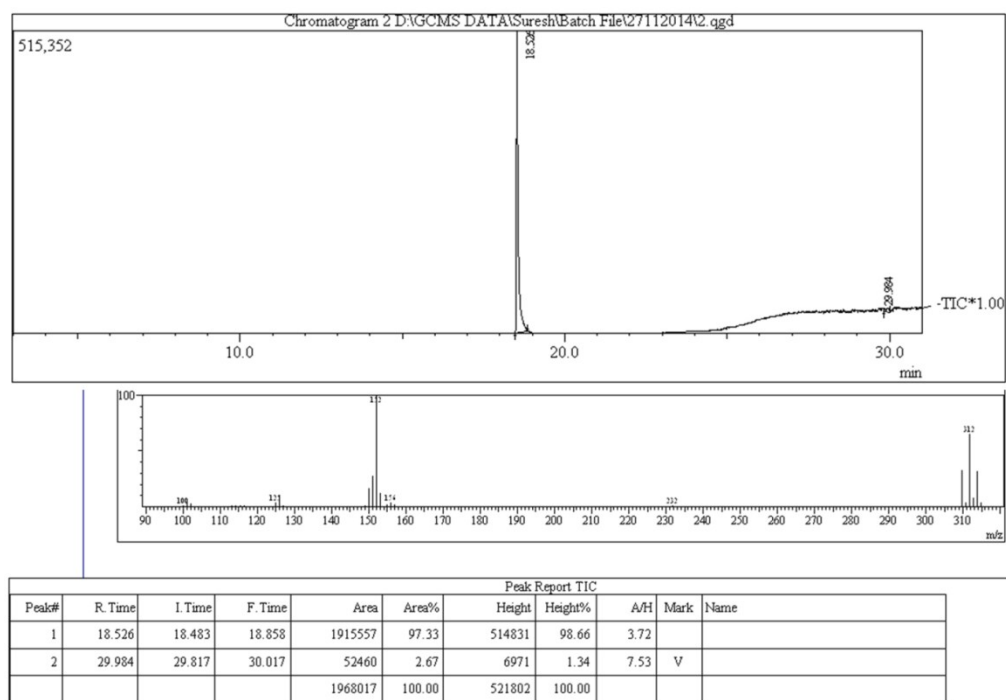

**Fig. S5** GC-MS of the catalytic reaction of a phenylboronic acid and iodobenzene showing near complete conversion within 24 hrs.

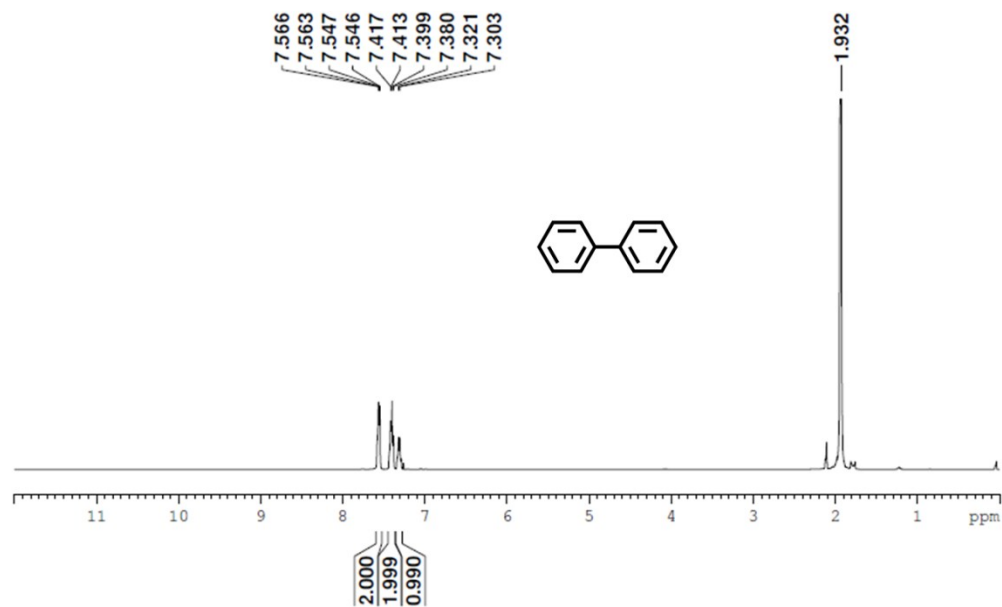

**Fig. S6**  $^1\text{H}$ -NMR spectra of biphenyl in  $\text{CDCl}_3$ .

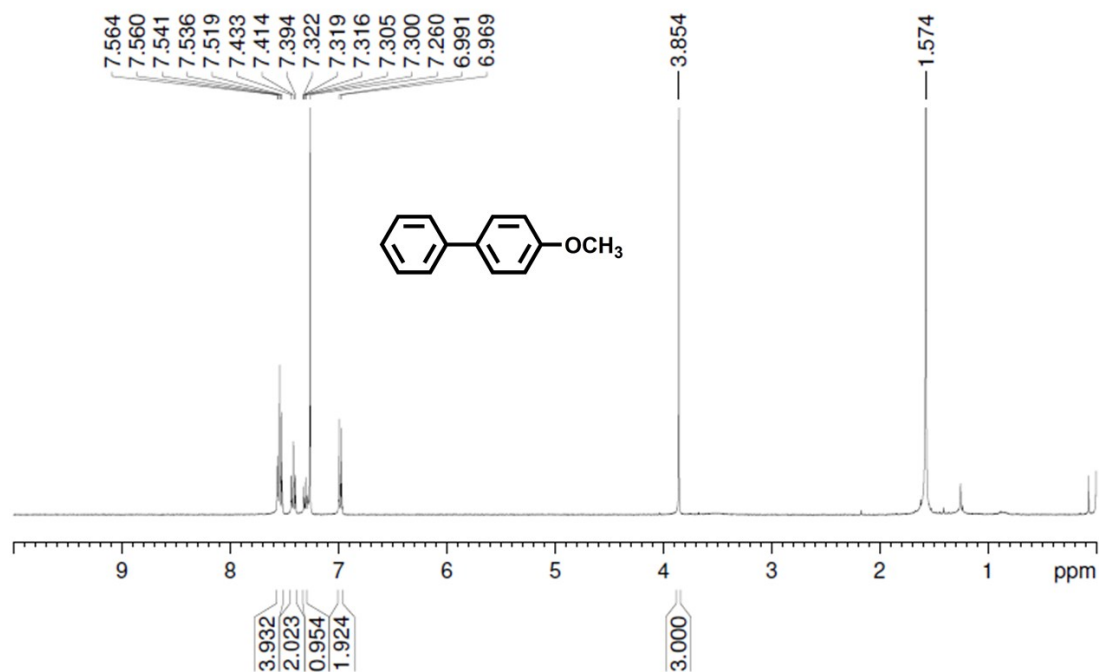

**Fig. S7**  $^1\text{H}$ -NMR spectra of 4-methoxybiphenyl in  $\text{CDCl}_3$ .

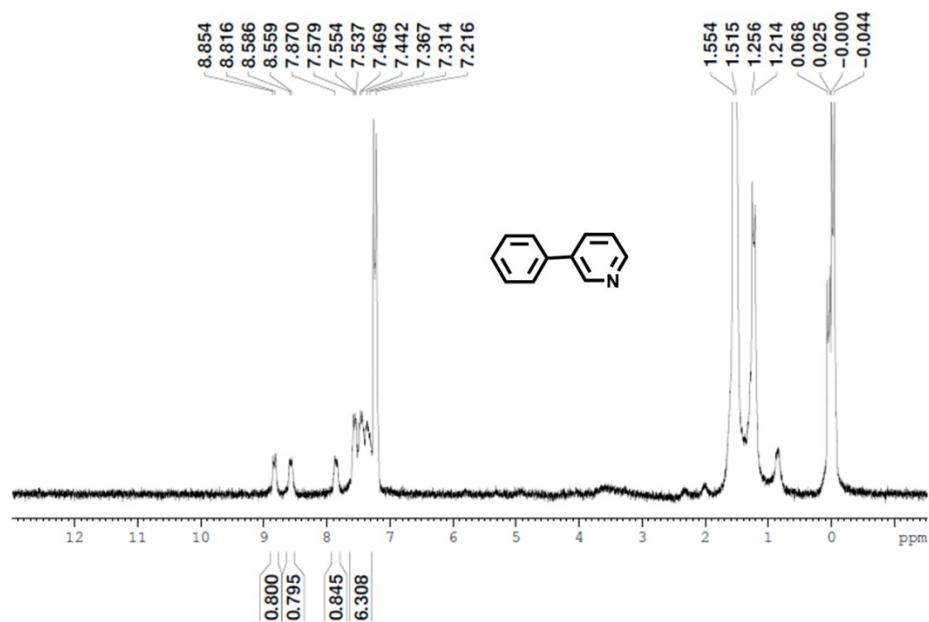

**Fig. S8**  $^1\text{H}$ -NMR spectra of 3-phenylpyridine in  $\text{CDCl}_3$ .

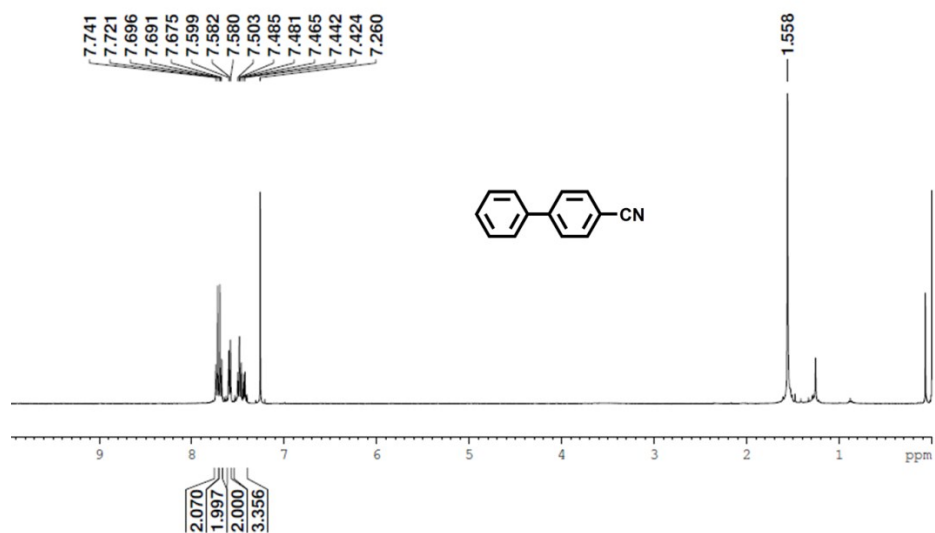

**Fig. S9** <sup>1</sup>H-NMR spectra of 4-phenylcyanobenzene in CDCl<sub>3</sub>.

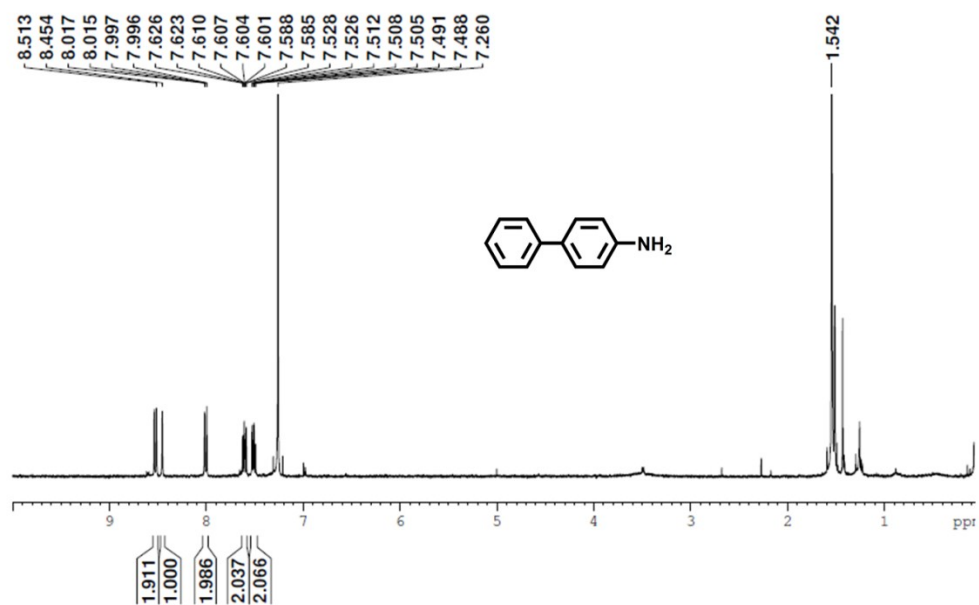

**Fig. S10** <sup>1</sup>H-NMR spectra of 4-phenylaniline in CDCl<sub>3</sub>.



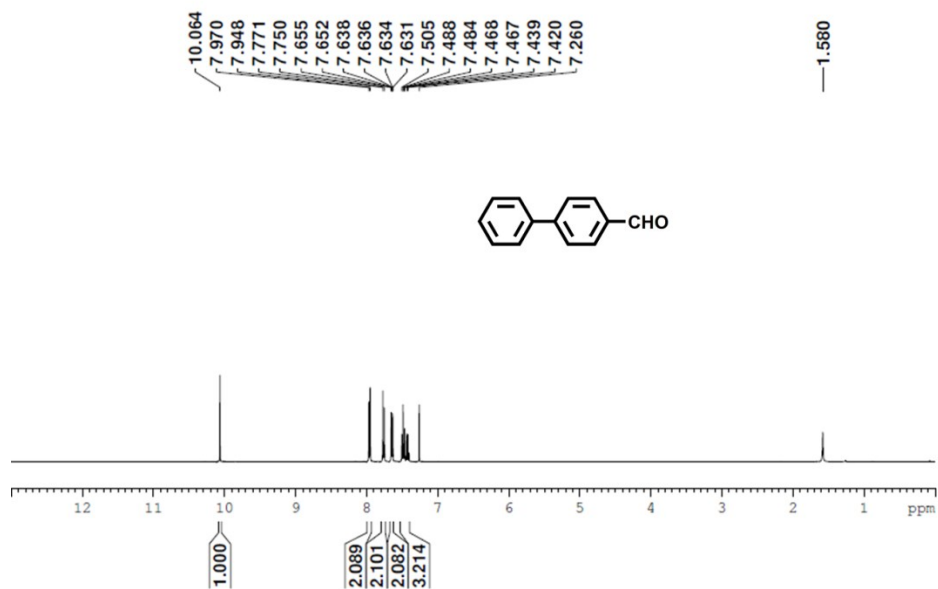

**Fig. S11** <sup>1</sup>H-NMR spectra of biphenylcarboxaldehyde in CDCl<sub>3</sub>.

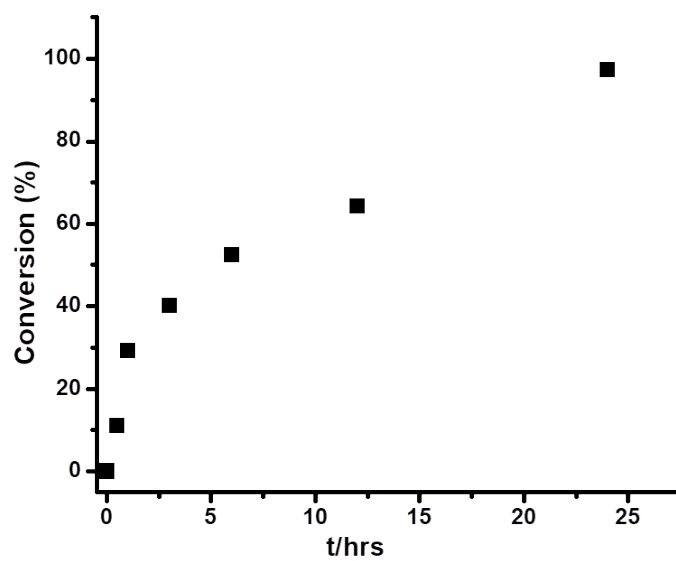

**Fig. S12** Time dependent conversion of iodobenzene to biphenyl using **Pd(0)@1a** catalyst.

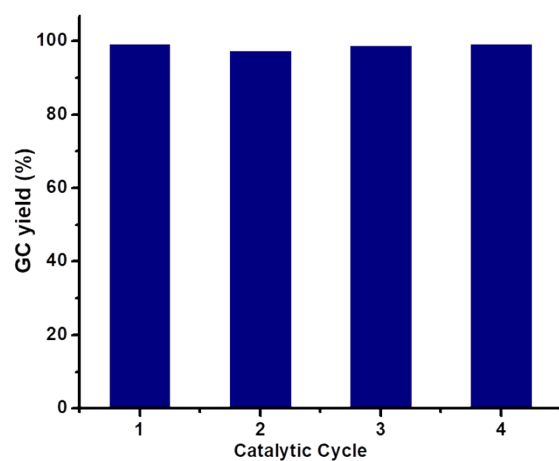

**Fig. S13** Catalytic performance of **Pd(0)@1a** upto four catalytic cycles showing excellent recyclability of the catalyst.

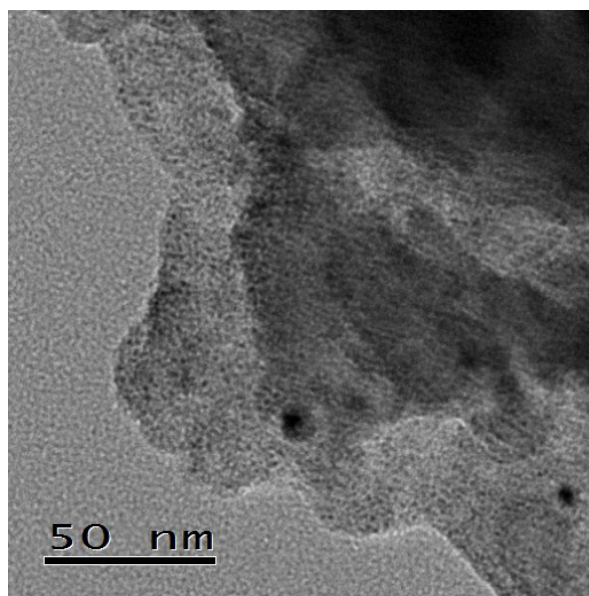

**Fig. S14** TEM images of **Pd(0)@1a** after four catalytic cycles.

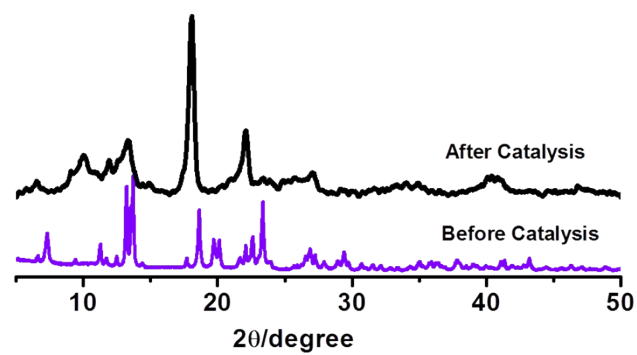

**Fig. S15** PXRD pattern of **Pd(0)@1a** before (blue) and after four catalytic cycles (black).

**Table 1. Crystal data and structure refinement parameters for 1.**

|                                             |                                                                  |
|---------------------------------------------|------------------------------------------------------------------|
| Identification code                         | <b>1</b>                                                         |
| Empirical formula                           | C <sub>21</sub> H <sub>20</sub> N <sub>2</sub> O <sub>8</sub> Cu |
| Formula weight                              | 491.93                                                           |
| Temperature/K                               | 298.15                                                           |
| Crystal system                              | triclinic                                                        |
| Space group                                 | P-1                                                              |
| a/Å                                         | 7.9154(17)                                                       |
| b/Å                                         | 10.025(2)                                                        |
| c/Å                                         | 13.447(3)                                                        |
| $\alpha$ /°                                 | 88.038(9)                                                        |
| $\beta$ /°                                  | 89.073(9)                                                        |
| $\gamma$ /°                                 | 70.501(7)                                                        |
| Volume/Å <sup>3</sup>                       | 1005.2(4)                                                        |
| Z                                           | 2                                                                |
| $\rho_{\text{calc}}/\text{g}/\text{cm}^3$   | 1.625                                                            |
| $\mu/\text{mm}^{-1}$                        | 1.141                                                            |
| F(000)                                      | 506.0                                                            |
| Crystal size/mm <sup>3</sup>                | 0.011 × 0.008 × 0.006                                            |
| Radiation                                   | MoK $\alpha$ ( $\lambda$ = 0.71073)                              |
| 2 $\theta$ range for data collection/°      | 5.46 to 50                                                       |
| Index ranges                                | -9 ≤ h ≤ 9, -11 ≤ k ≤ 11, -13 ≤ l ≤ 15                           |
| Reflections collected                       | 11386                                                            |
| Independent reflections                     | 3456 [ $R_{\text{int}}$ = 0.1244, $R_{\text{sigma}}$ = 0.2247]   |
| Data/restraints/parameters                  | 3456/12/289                                                      |
| Goodness-of-fit on F <sup>2</sup>           | 0.994                                                            |
| Final R indexes [ $I \geq 2\sigma(I)$ ]     | $R_1$ = 0.0882, $wR_2$ = 0.2229                                  |
| Final R indexes [all data]                  | $R_1$ = 0.1859, $wR_2$ = 0.2861                                  |
| Largest diff. peak/hole / e Å <sup>-3</sup> | 1.23/-1.28                                                       |
| Identification code                         | <b>1</b>                                                         |
| Empirical formula                           | C <sub>21</sub> H <sub>20</sub> CuN <sub>2</sub> O <sub>8</sub>  |
| Formula weight                              | 491.93                                                           |
| Temperature/K                               | 293(2)                                                           |
| Crystal system                              | triclinic                                                        |
| Space group                                 | P-1                                                              |
| a/Å                                         | 7.9154(17)                                                       |
| b/Å                                         | 10.025(2)                                                        |
| c/Å                                         | 13.447(3)                                                        |
| $\alpha$ /°                                 | 88.038(9)                                                        |
| $\beta$ /°                                  | 89.073(9)                                                        |
| $\gamma$ /°                                 | 70.501(7)                                                        |
| Volume/Å <sup>3</sup>                       | 1005.2(4)                                                        |
| Z                                           | 2                                                                |

|                                            |                                                                  |
|--------------------------------------------|------------------------------------------------------------------|
| $\rho_{\text{calc}}/\text{cm}^3$           | 1.625                                                            |
| $\mu/\text{mm}^{-1}$                       | 1.141                                                            |
| F(000)                                     | 506.0                                                            |
| Radiation                                  | MoK $\alpha$ ( $\lambda = 0.71073$ )                             |
| 2Theta range for data collection/ $^\circ$ | 3.04 to 50.08                                                    |
| Index ranges                               | $-9 \leq h \leq 6$ , $-11 \leq k \leq 11$ , $-13 \leq l \leq 15$ |
| Reflections collected                      | 10928                                                            |
| Independent reflections                    | 3371 [ $R_{\text{int}} = 0.1093$ , $R_{\text{sigma}} = 0.1220$ ] |
| Data/restraints/parameters                 | 3371/0/294                                                       |
| Goodness-of-fit on $F^2$                   | 1.044                                                            |
| Final R indexes [ $I \geq 2\sigma(I)$ ]    | $R_1 = 0.0915$ , $wR_2 = 0.2394$                                 |

**Table 2. Bond Lengths for 1**

| Atom | Atom              | Length/ $\text{\AA}$ |
|------|-------------------|----------------------|
| Cu01 | O2                | 1.933(6)             |
| Cu01 | O3 <sup>1</sup>   | 1.951(6)             |
| Cu01 | N1                | 2.008(7)             |
| Cu01 | N2                | 1.988(8)             |
| Cu01 | O1W               | 2.381(7)             |
| O3   | Cu01 <sup>2</sup> | 1.951(6)             |

**Table 3. Bond Angles for 1**

| Atom            | Atom | Atom              | Angle/°  |
|-----------------|------|-------------------|----------|
| O2              | Cu01 | O3 <sup>1</sup>   | 174.6(2) |
| O2              | Cu01 | N1                | 86.7(3)  |
| O2              | Cu01 | N2                | 94.0(3)  |
| O2              | Cu01 | O1W               | 90.6(2)  |
| O3 <sup>1</sup> | Cu01 | N1                | 88.2(3)  |
| O3 <sup>1</sup> | Cu01 | N2                | 90.6(3)  |
| O3 <sup>1</sup> | Cu01 | O1W               | 91.5(2)  |
| N1              | Cu01 | O1W               | 95.6(3)  |
| N2              | Cu01 | N1                | 166.7(3) |
| N2              | Cu01 | O1W               | 97.6(3)  |
| C1              | O2   | Cu01              | 115.0(6) |
| C8              | O3   | Cu01 <sup>2</sup> | 126.0(6) |
| C10             | N1   | Cu01              | 120.5(6) |
| C10             | N1   | C14               | 118.3(8) |
| C14             | N1   | Cu01              | 121.0(7) |
| C20             | N2   | Cu01              | 123.3(6) |
| C19             | N2   | Cu01              | 121.5(7) |

**Table 4.** Comparison of catalytic performance of various Pd@MOFs towards different organic transformations.

| S.No            | Pd@MOF                       | Pd(0) nps loading (wt%) | Catalytic reaction       | Time (hr) | Yield (%) |
|-----------------|------------------------------|-------------------------|--------------------------|-----------|-----------|
| 1 <sup>S1</sup> | Pd@MIL-101Cr-NH <sub>2</sub> | 8                       | Suzuki-Miyura coupling   | 6         | >99       |
| 2 <sup>S2</sup> | Pd(0)@1a (This work)         | 3.2                     | Suzuki coupling          | 24        | 95        |
| 3 <sup>S3</sup> | Pd/MIL-101                   | 3                       | One pot indole synthesis | 15        | 93        |
| 4 <sup>S4</sup> | Pd/APS-MIL-101               | 0.93                    | Heck coupling            | 1         | >95       |
| 5 <sup>S4</sup> | Pd/ED-MIL-101                | 0.95                    | Heck coupling            | 1         | >90       |
| 6 <sup>S5</sup> | Pd@MOF-3                     | 26.9                    | Heck coupling            | 24        | 99        |

## References.

- S1** V. Pascanu, Q. Yao, A. Bermejo Gómez, M. Gustafsson, Y. Yun, W. Wan, L. Samain, X. Zou and B. Martín-Matute, *Chem. Eur. J.*, 2013, **19**, 17483.
- S2** *Present work*
- S3** H. Li, Z. Zhu, F. Zhang, S. Xie, H. Li, P. Li and X. Zhou, *ACS Catal.*, 2011, **1**, 1604.
- S4** Y. K. Hwang, D.-Y. Hong, J.-S. Chang, S. H. Jhung, Y.-K. Seo, J. Kim, A. Vimont, M. Daturi, C. Serre and G. Férey, *Angew. Chem., Int. Ed. Engl.*, 2008, **47**, 4144.
- S5** B. Gole, U. Sanyal, R. Banerjee and P. S. Mukherjee, *Inorg. Chem.*, 2016, **55**, 2345.
